1 **HPV detection and genotyping of FFPE head and neck cancer biopsies by**  
2 **molecular testing to address new oropharyngeal squamous cell carcinoma**  
3 **classification based on HPV status.**

4  
5 **Running title:** HPV molecular tests comparison on FFPE HNSCC biopsies.  
6

7 **David Veyer<sup>1</sup>, Maxime Wack<sup>4,5</sup>, Ophélie Grard<sup>1</sup>, Pierre Bonfils<sup>3,5</sup>, Stéphane Hans<sup>3a</sup>,**  
8 **Laurent Belec<sup>1,5</sup>, Cécile Badoual<sup>2,5</sup>, Hélène Péré<sup>1,5,#</sup>**

9  
10 <sup>1</sup>Laboratoire de virologie, Hôpital Européen Georges Pompidou,  
11 and Assistance Publique - Hôpitaux de Paris, Paris, France ;

12 <sup>2</sup>Laboratoire d'anatomo-cytopathologie, Hôpital Européen Georges Pompidou,  
13 and Assistance Publique - Hôpitaux de Paris;

14 <sup>3</sup>Service d'ORL et chirurgie cervico-faciale, Hôpital Européen Georges Pompidou,  
15 and Assistance Publique - Hôpitaux de Paris;

16 <sup>4</sup>Département d'Informatique Médicale, Biostatistiques et Santé Publique, Hôpital Européen  
17 Georges Pompidou, and Assistance Publique - Hôpitaux de Paris

18 <sup>5</sup>Faculté de Médecine Paris Descartes, Université Paris Descartes (Paris V),  
19 Sorbonne Paris Cité, Paris  
20

21  
22  
23 **Key words:** Anyplex II HPV28 Seegene<sup>®</sup> HPV Genotyping assay; Inno-Lipa<sup>®</sup> HPV Genotyping  
24 Extra II ; HPV16 E6 viral load; HNSCC; FFPE biopsy  
25  
26

27 Corresponding author :

28  
29 Dr Hélène Péré  
30 [helene.pere@aphp.fr](mailto:helene.pere@aphp.fr)  
31  
32  
33  
34  
35

---

<sup>a</sup> Stéphane Hans is currently affiliated to the Service d'ORL et de chirurgie cervico-faciale at Hôpital FOCH, UFR Simone Veil, Université Versailles Saint Quentin-en-Yvelines.

36 **Abstract**

37 Recently, both the WHO/IARC (World Health Organisation/International Agency for  
38 Research on Cancer) and the American Joint Committee on Cancer (AJCC) have classified  
39 the oropharyngeal squamous cell carcinoma (OPSCC) on the basis of HPV status. For this  
40 purpose, the WHO/IARC recommended direct molecular HPV testing. In practice, formalin-  
41 fixed, paraffin-embedded (FFPE) biopsy specimens are frequently the only available samples.  
42 We herein compared in parallel two commercially available molecular assays that were firstly  
43 designed for cervical HPV detection and genotyping: Inno-Lipa<sup>®</sup> HPV genotyping extra II  
44 assay (Fujirebio, Gent, Belgium) (IL) and Anyplex<sup>™</sup> II HPV 28 (Seegene, Seoul, South  
45 Korea) (AP28).

46 Both assays were carried out on the same DNA extracts obtained from prospectively collected  
47 FFPE biopsies from OPSCC origin and results were compared.

48 A total of 55 samples were tested. By IL assay, chosen as reference assay, 27 (49.1%)  
49 biopsies were positive for HPV16, 10 (18.2%) were positive for HPV but negative for  
50 HPV16, and 18 (32.7%) were negative for HPV. A valid result with AP28 was obtained for  
51 51 biopsy samples (92.7%). Among 37 HPV-positive samples by IL, 33 (89.2%) were  
52 positive by AP28. The agreement between both assays was good (Cohen's  $\kappa = 0.78$ ). Among  
53 the six discrepancies between assays, always associated with low HPV16 viral load, four  
54 biopsies positive for HPV16 by IL could not be detected by AP28.

55 Taken together, these observations demonstrate that both assays could be used in routine for  
56 HPV detection and genotyping on FFPE-biopsy samples of head and neck tumour.

57

58

## 59 **Introduction**

60 With 600,000 cases per year, head and neck cancer was estimated to be the sixth most  
61 common cancer worldwide (1). Head and neck squamous cell carcinoma (HNSCC) represents  
62 90% of them. Since 2007, human papillomavirus (HPV) was considered as an independent  
63 risk factor for HNSCC by the World Health Organization's International Agency for Research  
64 on Cancer (WHO/IARC) (2). Broad genetic distribution of HPV has been reported in  
65 oropharyngeal squamous cell carcinoma (OPSCC), including HPV16 in 85% of cases,  
66 followed by HPV18, 31, 33, 35, 45, 51, 52, 56, 58, 59, 68 and 82 (3, 4). Finally, OPSCC is  
67 currently considered as an epidemic viral-induced carcinoma, since the incidence of HPV-  
68 positive carcinoma of the tonsil nearly doubled every 10 years (5–8).

69 Recently, the major modification in the eight edition of the American Joint Committee  
70 on Cancer (AJCC) Staging Manual, Head and Neck Section was the introduction of a specific  
71 staging algorithm for high-risk (HR) HPV-associated OPSCC (9). Furthermore, the 2017  
72 edition of the WHO/IARC on Head and Neck tumor classified the OPSCC on the basis of  
73 HPV status (10–12). HPV-positive OPSCC constitutes a tumor entity with better prognosis, a  
74 distinct epidemiological profile, with specific genetic features and clinical presentations and  
75 outcomes. Immuno-histochemical detection of HPV using p16 staining as surrogate marker of  
76 HPV has been until now widely carried out (13). The 2017-revised WHO/IARC  
77 recommendations introduced direct HPV testing based on *in-situ* hybridization and/or PCR in  
78 order to classify the OPSCC according to HPV status (12). Until now, several commercially  
79 available assays have been clinically validated for the detection and genotyping of HPV-  
80 associated cervical cancer (14, 15), whereas to our knowledge none have been validated for  
81 OPSCC. Furthermore, formalin-fixed, paraffin-embedded (FFPE) biopsy samples are  
82 frequently the only available ones for molecular testing after pathological examination. Such

83 FFPE samples however necessitate specific processing before PCR analysis because formalin  
84 fixation induces fragmentation of nucleic acids (16–18).

85 Taken together, the aim of the present study was to evaluate a new multiplex real-time  
86 PCR-based assay (Anyplex™ II HPV 28, Seegene, Seoul, South Korea) (AP28), allowing to  
87 detect and genotype a wide range of high-risk HPV genotypes and previously tested for  
88 cervical samples (19, 20), in a prospective series of OPSCC FFPE samples, by reference to  
89 Inno-Lipa® HPV genotyping extra II assay (Fujirebio, Gent, Belgium) (IL) chosen as  
90 reference assay (21–23).

91

## 92 **Materials and methods**

93 **Collection of biopsy samples and processing.** Head and neck biopsy samples received  
94 before treatment at the European Georges Pompidou hospital were prospectively included  
95 between 2014 and 2017 for routine pathologic examination. Patient had not received any  
96 treatment for their cancer at the time of the biopsy. The biopsies were fixed in formalin 10%  
97 overnight and included in paraffin. FFPE-biopsies diagnosed as HNSCC were selected by a  
98 pathologist for further cutting in 5- to 20- µm sections. Five sections were sent to the ISO  
99 15189-accredited virology laboratory of the hospital for DNA extraction prior to HPV  
100 detection and genotyping by IL and, in parallel, by in-house quantitative real-time PCR  
101 targeting E6 gene from HPV16 (HPV16 qPCR). Afterwards, same DNA extracts were  
102 subjected to multiplex HPV PCR by AP28.

103 **DNA extraction procedures.** Sections of FFPE-biopsies were deparaffinised overnight at  
104 +56°C with 40 µl of proteinase K (Qiagen, Hilden, Germany) and 360 µl of ATL buffer  
105 (Qiagen). Afterwards, 200 µl of ATL buffer were added and incubated 10 min at +70°C.  
106 DNA was further extracted using QiaAmp DNA Mini Kit (Qiagen), and eluted in 50 µl of  
107 PCR-grade water. For discordant results between IL and AP28, 5 new sections of biopsy

108 samples were also subjected to DNA extraction procedure optimized for FFPE-biopsies, as  
109 previously described by Steinau *et al* (17).

110 **HPV detection and genotyping in routine.** Two molecular HPV assays are used in parallel  
111 for routine HPV detection and genotyping on FFPE-biopsies. The IL assay consists of PCR  
112 amplification of a small 65 bp-fragment of the L1 gene using SPF10 primers sets and the  
113 ubiquitous gene human leukocyte antigen-DPB1 as internal control, followed by hybridization  
114 of specific HPV probes in a dedicated automat according to manufacturer's instructions. The  
115 IL assay detects 13 HR HPV (HPV -16, -18, -31, -33, -35, -39, -45, -51, -52, -56, -58, -59, -  
116 68), 9 low-risk (LR) HPV (HPV -06, -11, -40, -42, -43, -44, -54, -61, -81), 7 genotypes  
117 reported as possibly carcinogenic (HPV -26, -53, -66, -67, -70, -73, -82) and 3 genotypes not  
118 described as carcinogenic (HPV -62, -83, -89) (24).

119 HPV16 qPCR was also systematically carried out, as previously described (25), in  
120 order to double check every sample for HPV16 which constitutes the most prevalent HPV  
121 genotype in HNSCC (26), as well as to assess lack of contamination by IL. For quantification,  
122 serial dilutions of titrated Caski cells (Amplirun, Orgentec, France) were used to plot external  
123 standard curve.

124 Positive controls for HPV16 and HPV18 consisted in DNA extracted from SiHa and  
125 HeLa cell lines, respectively; water was used as negative control.

126 **HPV detection and genotyping by multiplex PCR.** The AP28 assay that distinguishes 28  
127 HPV genotypes, by amplifying 100 to 200 bp-fragments of the L1 gene [including 13 HR  
128 types (HPV -16, -18, -31, -33, -35, -39, -45, -51, -52, -56, -58, -59, and -68), 8 LR types (HPV -  
129 -6, -11, -40, -42, -43, -44, -54, -61) and 7 genotypes reported as possibly carcinogenic (HPV -  
130 26, 53, -66, -69, 70 -73 and -82)], and human gene  $\beta$ -globin in two different reactions was  
131 used for multiplex HPV molecular testing (27). Melting curves were obtained at 30, 40, and  
132 50 cycles. Results were first automatically analysed using the Seegene Viewer software,

133 version 2.0 (Seegene) and raw data of results were checked by the virologist. The results were  
134 considered as invalid when the negative controls were negative and no HPV was found. An  
135 estimation of the viral load was approached by indicating the cycle number at which the  
136 positivity was detected: + (50 cycles), ++ (40 cycles) and +++ (30 cycles).

137 **Ethical clearance.** All included patients belonged to a cohort declared and approved by the  
138 Ethics Committee (Comité de Protection des Personnes Ile de France II, no. 2015-09-04)

139 **Statistical analysis.** IL assay was chosen in our laboratory as the reference technique for  
140 HPV detection and genotyping, because the assay was reported to show high analytical  
141 sensitivity and specificity on FFPE samples (28, 29). Results strictly similar by AP28 and IL  
142 assays were defined as identical; results giving at least one identical HPV genotype by AP28  
143 and IL assays were defined as compatible; other results were defined as discordant.  
144 Agreement between IL and AP28 assays was assessed by the Cohen's  $\kappa$  test: 1 indicating  
145 perfect agreement; 1 to 0.81, very good agreement; 0.80 to 0.61, good agreement; 0.60 to  
146 0.21; moderate to poor agreement. The Mann-Whitney test was used to compare HPV16 viral  
147 loads between samples showing concordant or discordant results. A linear regression model  
148 was used to assess the relation between the viral load and the semi-quantitative result of  
149 AP28.

150

## 151 **Results**

152 Fifty-five biopsy samples from patients followed for HNSCC were prospectively selected. By  
153 the IL assay, 27 (49.1%) biopsies were HPV16-positive and 10 (18.2%) were HPV-positive  
154 but not HPV16-positive, as depicted in the Table 1. Among the 37 positive samples, 3  
155 (biopsies #8, #19 and #33) were positive for more than one HPV. Finally, 18 (32.7%) biopsy  
156 samples were HPV-negative.

157

158 **Comparison of HPV detection and genotyping results between IL and AP28 assays.**

159 The same DNA extracts from the 55 selected biopsy samples tested by IL were further  
160 subjected to AP28 assay. Among 7 discordant samples, one that was initially negative when  
161 analyzed with the Seegene Viewer software was finally classified as positive after raw data  
162 analysis; the raw data analysis of the remaining discordant samples (corresponding to 10.9%  
163 of samples) gave similar results to the ones obtained by automatic analysis. Final results are  
164 shown in the Tables 1 and 2. A valid result with AP28 was obtained for 51 biopsy samples  
165 (92.7%) (Table 2). Among the 37 HPV-positive biopsy samples by IL, 33 (89.2%) were  
166 found positive by AP28, including 90.9% of identical results and 9.1% of compatible results,  
167 the remaining results being either invalid (n=2) or negative (n=2). Finally, the vast majority  
168 (n=16; 88.9%) of 18 biopsy samples negative by IL were also negative by AP28; only 2 IL-  
169 negative biopsies were found invalid by AP28. The overall agreement between both assays  
170 was good (Cohen's  $\kappa$  coefficient = 0.78). Among the 27 samples that were HPV16-positive  
171 with IL, AP28 detected HPV16 in 23 (85.2%), 2 (7.4%) were negative and 2 (7.4%) invalid  
172 (Table 1). AP28 did not detect any HPV16 in samples that were negative for HPV16 with IL.  
173 Regarding HPV16 detection, the agreement between both assays was good (Cohen's  
174  $\kappa$  coefficient=0.75).

175 **HPV16 viral load.** HPV16 qPCR was carried out on the 55 biopsy samples. All HPV16-  
176 positive samples with IL were positive by HPV16 qPCR and all HPV16-negative samples  
177 with IL were also negative with HPV16 qPCR (Table 1). The median of HPV16 viral loads  
178 was higher in concordant than in discordant samples [20,800 copies/ $\mu$ l (4.32 log/ $\mu$ l), range,  
179 734-595000 *versus* 503 copies/ $\mu$ l (2.70 log/ $\mu$ l), range, 133-512; P=0.00077]. Interestingly, the  
180 HPV16 viral loads of IL-positive/AP28-negative results were low (Table 1). As expected,  
181 using a linear regression model, a significant relation (P=0.000388) was observed between the  
182 viral load (expressed in log<sub>10</sub>) and the AP28 semi-quantitative results with a linear coefficient

183 of 0.79 log between each level of AP28 (negative, +, ++ and +++). The Figure 1 depicts the  
184 results of HPV16 viral loads and AP28 semi-quantitative results.

185

## 186 **Discussion**

187 We herein compared on a large series of FFPE-biopsy samples of HNSCC two  
188 commercially available molecular assays targeting L1 gene for routine HPV detection and  
189 genotyping. Nearly half of FFPE-biopsy samples from patients followed for HNSCC in our  
190 hospital was found positive for HPV DNA using IL as reference assay, emphasizing the need  
191 to strictly follow the recent 2017-revised WHO/IARC recommendation of direct HPV testing  
192 in case of OPSCC. Both assays showed good agreement for HPV detection as well as for  
193 genotyping. However, rare discrepancies between assays could be observed with positive  
194 samples for HPV16 by IL which were not detected by AP28. Interestingly, these  
195 discrepancies were always associated with low HPV16 viral load. These observations  
196 demonstrate that both assays could be used in routine for HPV detection and genotyping on  
197 FFPE-biopsy samples of HNSCC, keeping in mind that a few biopsy samples with low  
198 HPV16 viral load could be missed. Taken together, our findings clearly emphasize the  
199 necessity to validate commercially available molecular assays on patients' biopsy samples,  
200 and to confront the results with other molecular technics in case of low HPV viral load.

201 In the present series, the calculated agreement between IL and AP28 results was good,  
202 both for HPV16 and other genotypes. However, around ten percent of biopsy samples gave  
203 discrepancies between both assays, including biopsies positive for HPV16 by IL which were  
204 not detected by AP28. Using HPV16 qPCR, low HPV16 viral load was clearly associated  
205 with the misdetection of HPV16 by AP28 assay. Although HPV16 viral load was not  
206 normalized on extracted DNA quantity, the experimentations were carried out on the same  
207 tissue extract allowing accurate comparison of the results obtained by AP28 and HPV16



208 qPCR. The capability of IL assay to detect HPV16 in samples harboring low HPV16 viral  
209 load is likely due to sufficient amplification efficiency in samples containing fragmented  
210 DNA. Indeed, it is well reported that DNA recovering in FFPE specimens may be influenced  
211 by several factors, such as formalin quality and concentration, length of fixation, paraffin  
212 quality and temperature (30). As a consequence, DNA in FFPE biopsy is either completely or  
213 partially degraded into DNA fragments of 200 bp or less (16). The IL assay relies on the  
214 amplification of shorter fragments than AP28 assay, a feature which could partly explain the  
215 discrepancies observed between both assays in our series. Furthermore, discordant results  
216 could also be associated with extract quantity used for experiment. Thus, the IL assay requires  
217 more quantity of tissue extract (10  $\mu$ l) than AP28 (5  $\mu$ l), according to manufacturers'  
218 instructions. The possibility may be also envisioned that mutations affecting the priming sites  
219 of AP28 primers could have led to misdetection. This hypothesis should be however ruled out  
220 because the correlation between the efficiency of detection by AP28 and HPV16 viral load  
221 was marked. Finally, we checked that observed discrepancies were not due to extraction  
222 procedures.

223 In our series, one negative sample by AP28 which was positive by IL was finally  
224 diagnosed as positive for HPV16 after analysis of the raw data. This finding indicates that raw  
225 data of every AP28 negative samples need to be analyzed in order to detect some of the false-  
226 negative results. Indeed, the automatic analysis and cut-off used by AP28 test may miss out  
227 some HPV-positive samples since the assay was primarily designed to detect HPV on either  
228 cervical swab or liquid based cytology specimen and not on FFPE samples from  
229 oropharyngeal origin. In practice, the automatic Seegene software interpretation should be  
230 used with caution for negative or invalid FFPE biopsies.

231 Our observations indicate that IL as well as AP28 assays could be used in clinical  
232 laboratory to detect and genotype HPV in FFPE OPSCC biopsy samples. To our knowledge,

233 only one study compared the performance of the AP28 assay and the CLART system from  
234 Genomica (Madrid, Spain) on only 3 FFPE HNSCC samples (27). In our series, the IL assay  
235 appeared as sensitive as in-house HPV16 qPCR, in keeping with previous reports showing  
236 that IL is highly reliable on FFPE archival samples. Nevertheless, the AP28 technic could be  
237 preferred depending on the recruitment of the laboratory, particularly if the number of  
238 samples is important. Indeed, AP28 relies on real-time PCR, which allows easier and faster  
239 procedure as compared with IL technic which appears more cumbersome and requires  
240 specific material for hybridization on membrane following PCR amplification. In addition, the  
241 risk of cross contamination between samples is less important with AP28 than with IL.  
242 However, it should be kept in mind that misdetection of HPV16-positive biopsies could occur  
243 with AP28 assay. Since HPV16 is known to be the most prevalent HPV genotype in OPSCC,  
244 diagnosed in 85% of cases (26), one could strongly recommend confirming the negative  
245 results by AP28 with HPV16 genotype-specific molecular assay validated on FFPE samples.  
246 In our laboratory, we have chosen to screen first for HPV16 by in-house HPV16 qPCR, and  
247 then to test further the negative samples with IL or AP28 to potentially detect less common  
248 genotypes in OPSCC, or confirm the negativity for HPV.

249 In conclusion, our observations demonstrate that both commercially available IL and  
250 AP28 assays could be used in clinical laboratories with similar performances in routine on  
251 OPSCC FFPE samples, in order to address the recent recommendations for direct HPV testing  
252 in OPSCC (12). Nevertheless, low HPV viral load in FFPE biopsy samples could be a  
253 limiting factor, rendering in medical practice the diagnosis of HPV in OPSCC sometimes  
254 difficult. Finally, HPV diagnosis and genotyping in OPSCC may necessitate several  
255 complementary technics, to overcome the limitation of some commercially available assays.

256

257

258 **Authors' contributions.** DV, OG, CB and HP have conceived and designed the research;

259 OG, has performed the experiments; MW performed statistical analyses; DV, PB, SH, CB and

260 HP analyzed the results ; DV, LB and HP drafted the manuscript.

261 **Funding.** No grant was received for the study.

262

263

264 **References**

- 265 1. Dayyani F, Etzel CJ, Liu M, Ho C-H, Lippman SM, Tsao AS. 2010. Meta-analysis of  
266 the impact of human papillomavirus (HPV) on cancer risk and overall survival in head  
267 and neck squamous cell carcinomas (HNSCC). *Head Neck Oncol* 2:15.
- 268 2. IARC Working Group on the Evaluation of Carcinogenic Risks to Humans. 2007.  
269 Human papillomaviruses. *IARC Monogr Eval Carcinog risks to humans* 90:1–636.
- 270 3. Kreimer AR, Clifford GM, Boyle P, Franceschi S. 2005. Human Papillomavirus Types  
271 in Head and Neck Squamous Cell Carcinomas Worldwide: A Systematic Review.  
272 *Cancer Epidemiol Biomarkers Prev* 14:467–475.
- 273 4. Si-Mohamed A, Badoual C, Hans S, Péré H, Tartour E, Brasnu D. 2012. An unusual  
274 human papillomavirus type 82 detection in laryngeal squamous cell carcinoma: case  
275 report and review of literature. *J Clin Virol* 54:190–3.
- 276 5. Ryerson AB, Peters ES, Coughlin SS, Chen VW, Gillison ML, Reichman ME, Wu X,  
277 Chaturvedi AK, Kawaoka K. 2008. Burden of potentially human papillomavirus-  
278 associated cancers of the oropharynx and oral cavity in the US, 1998-2003. *Cancer*  
279 113:2901–9.
- 280 6. Hocking JS, Stein A, Conway EL, Regan D, Grulich A, Law M, Brotherton JML.  
281 2011. Head and neck cancer in Australia between 1982 and 2005 show increasing  
282 incidence of potentially HPV-associated oropharyngeal cancers. *Br J Cancer* 104:886–  
283 91.
- 284 7. Näsman A, Attner P, Hammarstedt L, Du J, Eriksson M, Giraud G, Ährlund-Richter S,  
285 Marklund L, Romanitan M, Lindquist D, Ramqvist T, Lindholm J, Sparén P, Ye W,  
286 Dahlstrand H, Munck-Wikland E, Dalianis T. 2009. Incidence of human  
287 papillomavirus (HPV) positive tonsillar carcinoma in Stockholm, Sweden: An  
288 epidemic of viral-induced carcinoma? *Int J Cancer* 125:362–366.

- 289 8. Chaturvedi AK. 2012. Epidemiology and Clinical Aspects of HPV in Head and Neck  
290 Cancers. *Head Neck Pathol* 6:16–24.
- 291 9. Lydiatt WM, Patel SG, O’Sullivan B, Brandwein MS, Ridge JA, Migliacci JC, Loomis  
292 AM, Shah JP. 2017. Head and Neck cancers-major changes in the American Joint  
293 Committee on cancer eighth edition cancer staging manual. *CA Cancer J Clin* 67:122–  
294 137.
- 295 10. Westra WH, Lewis JS. 2017. Update from the 4th Edition of the World Health  
296 Organization Classification of Head and Neck Tumours: Oropharynx. *Head Neck*  
297 *Pathol* 11:41–47.
- 298 11. El-Naggar AK, Chan JKC, Takata T, Grandis JR, Slootweg PJ. 2017. The fourth  
299 edition of the head and neck World Health Organization blue book: editors’  
300 perspectives. *Hum Pathol* 66:10–12.
- 301 12. El-Naggar AK, Chan JKC, Rubin Grandis J, Takata T, Slootweg PJ, International  
302 Agency for Research on Cancer. WHO classification of head and neck tumours.
- 303 13. Augustin J, Outh-Gauer S, Mandavit M, Gasne C, Grard O, Denize T, Nervo M,  
304 Mirghani H, Laccourreye O, Bonfils P, Bruneval P, Veyer D, Péré H, Tartour E,  
305 Badoual C. 2018. Evaluation of the efficacy of the 4 tests (p16 immunochemistry,  
306 polymerase chain reaction, DNA, and RNA in situ hybridization) to evaluate a human  
307 papillomavirus infection in head and neck cancers: a cohort of 348 French squamous  
308 cell carcinomas. *Hum Pathol* 78:63–71.
- 309 14. Arbyn M, Snijders PJF, Meijer CJLM, Berkhof J, Cuschieri K, Kocjan BJ, Poljak M.  
310 2015. Which high-risk HPV assays fulfil criteria for use in primary cervical cancer  
311 screening?
- 312 15. Hesselink AT, Sahli R, Berkhof J, Snijders PJF, van der Salm ML, Agard D, Bleeker  
313 MCG, Heideman DAM. 2016. Clinical validation of Anyplex<sup>TM</sup> II HPV HR Detection

- 314 according to the guidelines for HPV test requirements for cervical cancer screening. *J*  
315 *Clin Virol* 76:36–39.
- 316 16. Gilbert MTP, Haselkorn T, Bunce M, Sanchez JJ, Lucas SB, Jewell LD, Van Marck E,  
317 Worobey M. 2007. The isolation of nucleic acids from fixed, paraffin-embedded  
318 tissues-which methods are useful when? *PLoS One* 2:e537.
- 319 17. Steinau M, Patel SS, Unger ER. 2011. Efficient DNA extraction for HPV genotyping  
320 in formalin-fixed, paraffin-embedded tissues. *J Mol Diagn* 13:377–81.
- 321 18. Kocjan BJ, Hošnjak L, Poljak M. 2016. Detection of alpha human papillomaviruses in  
322 archival formalin-fixed, paraffin-embedded (FFPE) tissue specimens. *J Clin Virol* 76  
323 *Suppl* 1:S88–S97.
- 324 19. Kwon M-J, Roh KH, Park H, Woo H-Y. 2014. Comparison of the Anyplex II HPV28  
325 assay with the Hybrid Capture 2 assay for the detection of HPV infection. *J Clin Virol*  
326 59:246–9.
- 327 20. Estrade C, Sahli R, McAdam AJ. 2014. Comparison of Seegene Anyplex II HPV28  
328 with the PGMY-CHUV assay for human papillomavirus genotyping. *J Clin Microbiol*  
329 52:607–12.
- 330 21. Alberizzi P, Spinillo A, Gardella B, Cesari S, Silini EM. 2014. Evaluation of the HPV  
331 typing INNO-LiPA EXTRA assay on formalin-fixed paraffin-embedded cervical  
332 biopsy samples. *J Clin Virol* 61:535–9.
- 333 22. Castro FA, Koshiol J, Quint W, Wheeler CM, Gillison ML, Vaughan LM, Kleter B,  
334 van Doorn L-J, Chaturvedi AK, Hildesheim A, Schiffman M, Wang SS, Zuna RE,  
335 Walker JL, Dunn ST, Wentzensen N. 2015. Detection of HPV DNA in paraffin-  
336 embedded cervical samples: a comparison of four genotyping methods. *BMC Infect*  
337 *Dis* 15:544.
- 338 23. St Guily JL, Jacquard A-C, Prétet J-L, Haesebaert J, Beby-Defaux A, Clavel C, Agius

- 339 G, Birembaut P, Okais C, Léocmach Y, Soubeyrand B, Pradat P, Riethmuller D,  
340 Mougins C, Denis F. 2011. Human papillomavirus genotype distribution in oropharynx  
341 and oral cavity cancer in France--The EDiTH VI study. *J Clin Virol* 51:100–4.
- 342 24. IARC Working Group on the Evaluation of Carcinogenic Risks to Humans.,  
343 International Agency for Research on Cancer. 2012. A review of human carcinogens.  
344 Biological agents. International Agency for Research on Cancer.
- 345 25. Prétet J-L, Dalstein V, Monnier-Benoit S, Delpuech S, Mougins C. 2004. High risk HPV  
346 load estimated by Hybrid Capture II® correlates with HPV16 load measured by real-  
347 time PCR in cervical smears of HPV16-infected women. *J Clin Virol* 31:140–147.
- 348 26. Gillison ML, Chaturvedi AK, Anderson WF, Fakhry C. 2015. Epidemiology of Human  
349 Papillomavirus–Positive Head and Neck Squamous Cell Carcinoma. *J Clin Oncol*  
350 33:3235–3242.
- 351 27. Lillsunde Larsson G, Carlsson J, Karlsson MG, Helenius G. 2015. Evaluation of HPV  
352 Genotyping Assays for Archival Clinical Samples. *J Mol Diagn* 17:293–301.
- 353 28. Gravitt PE, van Doorn LJ, Quint W, Schiffman M, Hildesheim A, Glass AG, Rush BB,  
354 Hellman J, Sherman ME, Burk RD, Wang SS. 2007. Human papillomavirus (HPV)  
355 genotyping using paired exfoliated cervicovaginal cells and paraffin-embedded tissues  
356 to highlight difficulties in attributing HPV types to specific lesions. *J Clin Microbiol*  
357 45:3245–50.
- 358 29. Tan SE, Garland SM, Rumbold AR, Tabrizi SN. 2011. Comparison of the INNO-LiPA  
359 and PapType assays for detection of human papillomavirus in archival vulva dysplasia  
360 and/or neoplasia tissue biopsy specimens. *J Clin Microbiol* 49:3980–2.
- 361 30. Klopffleisch R, Weiss ATA, Gruber AD. 2011. Excavation of a buried treasure--DNA,  
362 mRNA, miRNA and protein analysis in formalin fixed, paraffin embedded tissues.  
363 *Histol Histopathol* 26:797–810.

364 **Table 1.** HPV detection and genotyping by IL, AP28 and E6 HPV-16 detection and quantification by  
 365 in-house PCR of 37 IL-positive FFPE-biopsies diagnosed as HNSCC. HPV 16-positive  
 366 samples are presented by increasing viral load.

| ID  | HPV genotyping results |                                                   | In-house E6 HPV16 PCR  |                                 |
|-----|------------------------|---------------------------------------------------|------------------------|---------------------------------|
|     | IL                     | AP28<br>(semi-quantitative results <sup>a</sup> ) | Qualitative<br>results | Viral load<br>[copies/μl (log)] |
| #3  | HPV16                  | Invalid <sup>b</sup>                              | Positive               | ND                              |
| #5  | HPV16                  | Invalid <sup>b</sup>                              | Positive               | 133 (2.12)                      |
| #7  | HPV16                  | Negative <sup>b</sup>                             | Positive               | 503 (2.70)                      |
| #4  | HPV16                  | Negative <sup>b</sup>                             | Positive               | 512 (2.72)                      |
| #30 | HPV16                  | HPV16 (+)                                         | Positive               | 734 (2.87)                      |
| #50 | HPV16                  | HPV16 (++)                                        | Positive               | 3,910 (3.59)                    |
| #33 | HPV16 ; HPV82          | HPV16 (+)                                         | Positive               | 4,000 (3.60)                    |
| #9  | HPV16                  | HPV16 (++)                                        | Positive               | 4,860 (3.69)                    |
| #14 | HPV16                  | HPV16 (++)                                        | Positive               | 5,010 (3.70)                    |
| #46 | HPV16                  | HPV16 (++)                                        | Positive               | 5,070 (3.70)                    |
| #10 | HPV16                  | HPV16 (++)                                        | Positive               | 5,360 (3.73)                    |
| #45 | HPV16                  | HPV16 (++)                                        | Positive               | 5,650 (3.75)                    |
| #35 | HPV16                  | HPV16 (++)                                        | Positive               | 7,730 (3.89)                    |
| #13 | HPV16                  | HPV16 (+)                                         | Positive               | 9,230 (3.97)                    |
| #49 | HPV16                  | HPV16 (++)                                        | Positive               | 20,200 (4.31)                   |
| #44 | HPV16                  | HPV16 (++)                                        | Positive               | 20,800 (4.32)                   |
| #12 | HPV16                  | HPV16 (+)                                         | Positive               | 35,200 (4.55)                   |
| #2  | HPV16                  | HPV16 (+)                                         | Positive               | 40,200 (4.60)                   |
| #48 | HPV16                  | HPV16 (++)                                        | Positive               | 78,300 (4.89)                   |
| #11 | HPV16                  | HPV16 (++)                                        | Positive               | 78,400 (4.89)                   |
| #32 | HPV16                  | HPV16 (++)                                        | Positive               | 80,200 (4.90)                   |
| #16 | HPV16                  | HPV16 (++)                                        | Positive               | 82,400 (4.92)                   |
| #6  | HPV16                  | HPV16 (++)                                        | Positive               | 112,000 (5.05)                  |
| #27 | HPV16                  | HPV16 (++)                                        | Positive               | 128,000 (5.11)                  |
| #39 | HPV16                  | HPV16 (++)                                        | Positive               | 183,000 (5.26)                  |
| #1  | HPV16                  | HPV16 (++)                                        | Positive               | 323,000 (5.51)                  |
| #42 | HPV16                  | HPV16 (+++)                                       | Positive               | 595,000 (5.77)                  |
| #34 | HPV6                   | HPV6 (++)                                         | Negative               | NA                              |
| #43 | HPV6                   | HPV6 (++)                                         | Negative               | NA                              |
| #18 | HPV11                  | HPV11 (++)                                        | Negative               | NA                              |
| #31 | HPV11                  | HPV11 (++)                                        | Negative               | NA                              |
| #40 | HPV11                  | HPV11 (++)                                        | Negative               | NA                              |
| #19 | HPV18 ; HPV39p         | HPV18 (++)                                        | Negative               | NA                              |
| #47 | HPV18                  | HPV18 (+++)                                       | Negative               | NA                              |
| #8  | HPV33 ; HPV52p         | HPV33 (+++)                                       | Negative               | NA                              |
| #38 | HPV59                  | HPV59 (++)                                        | Negative               | NA                              |
| #22 | HPV82                  | HPV82 (+++)                                       | Negative               | NA                              |

367 <sup>a</sup> Semi-quantitative results are given in brackets (detection of signal at 30 cycles: +++ ; 40 cycles: ++ ; 50 cycles: +);

368 <sup>b</sup> Results checked manually without the automated analysis software (Seegene Viewer version 2.0, Seegene).



369 IL: Inno-Lipa<sup>®</sup> HPV genotyping extra II assay (Fujirebio, Gent, Belgium); AP28: Anyplex<sup>™</sup> II HPV 28, Seegene (Seoul, South  
370 Korea); NA: Not attributable; ND: Not done; p: probable

371

372

373 **Table 2.** Qualitative detection of HPV by IL and AP28

374 assays in 55 FFPE-biopsies diagnosed as HNSCC.

375

| 376 | <b>IL/AP28 results</b>     | <b>N (%)</b>             |
|-----|----------------------------|--------------------------|
| 377 |                            |                          |
| 378 |                            |                          |
| 379 | <b>Concordant results</b>  |                          |
| 380 | . <b>Positive/Positive</b> | 33 (60.0)                |
| 381 | o <b>Identical</b>         | 30 (90.9) <sup>a,b</sup> |
| 382 | o <b>Compatible</b>        | 3 (9.1) <sup>c</sup>     |
| 383 | . <b>Negative/Negative</b> | 16 (29.1)                |
| 384 |                            |                          |
| 385 | <b>Discordant results</b>  |                          |
| 386 | . <b>Positive/Negative</b> | 2 (3.6)                  |
| 387 | . <b>Positive/Invalid</b>  | 2 (3.6)                  |
| 388 | . <b>Negative/Invalid</b>  | 2 (3.6)                  |
| 389 |                            |                          |
| 390 | <b>Total</b>               | <b>55 (100.0)</b>        |

391

392 <sup>a</sup> In brackets: percentage of IL/AP28 concordant out of total Positive/Positive;

393 <sup>b</sup> Among discordant samples, only one initially negative by Seegene Viewer  
394 software (Seegene) showed raw data compatible with positivity, and was  
395 classified as positive sample;

396 <sup>c</sup> In brackets: percentage of IL/AP28 compatible out of total Positive/Positive.

397 IL: Inno-Lipa<sup>®</sup> HPV genotyping extra II assay (Fujirebio, Gent, Belgium);

398 AP28: Anyplex<sup>™</sup> II HPV 28, Seegene (Seoul, South Korea)

399

400

401 **Legend for the figure**

402 **Figure 1.** Comparison of HPV16 viral loads (in-house qPCR) and HPV16 AP28 semi-  
403 quantitative results. HPV16 semi-quantitative results are presented as negative, +, ++ and +++  
404 according to the cycle at which the signal is detected (no detection, detection at 50, 40 and 30  
405 cycles respectively). The Spearman's rank correlation test is shown on the figure ( $R=0.54$ ,  
406  $p=0.0058$ ).

407

Spearman's rank correlation test:  $R = 0.54$   $p = 0.0058^{**}$

Viral load HPV16 (log10)

6

5

4

3

Negative

+

++

+++

AP28 semi-quantitative result

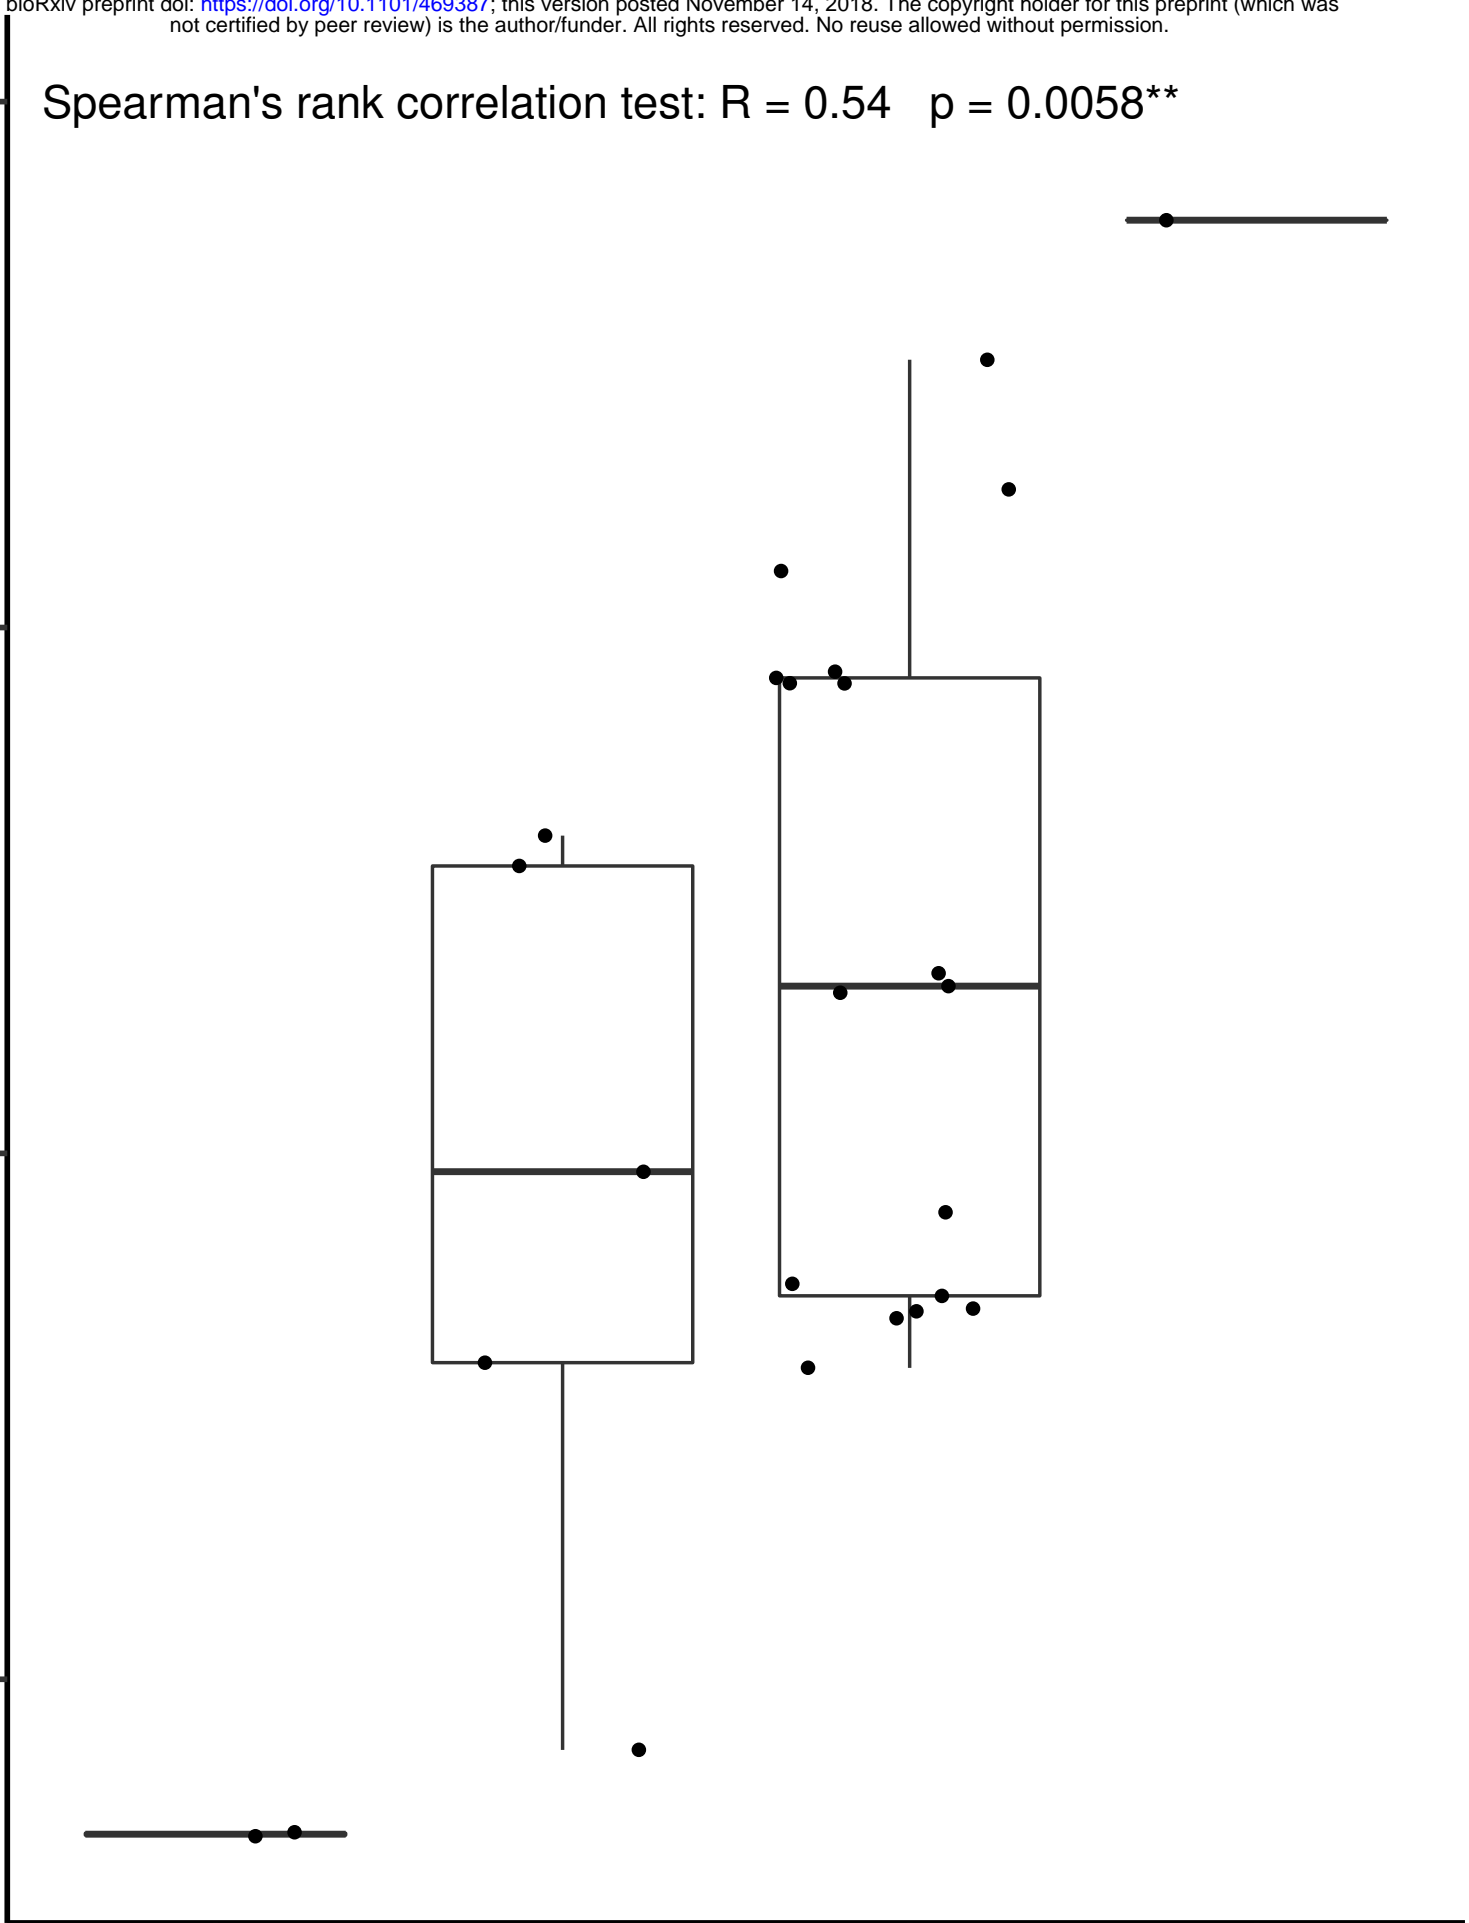

Source: https://www.biorxiv.org/content/10.1101/469387v1.full.pdf
